# Supplementary material for: 3D printed scaffolds with gradient porosity based on a cellulose nanocrystal hydrogel
Source: Royal Society of Chemistry journal article supplement (doi:10.1039/c7nr08966j), 2018-01-01
Supplement: c7nr08966j1.pdf [file c7nr08966j1.pdf]

## Supporting information

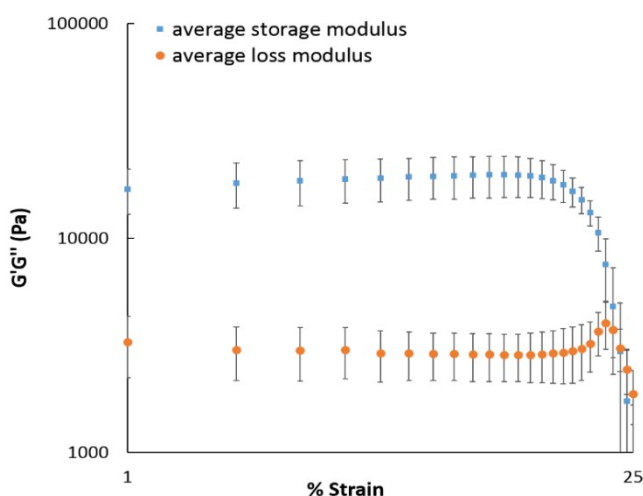

Figure S1 To determine the linear-viscoelastic (LVE) region, storage moduli  $G'$  and loss moduli  $G''$  were plotted against the deformation (% strain). The plateau value of  $G'$  in the LVE-region describes the rigidity of the sample at rest; the plateau value  $G''$  ( $1.98 \times 10^4$  Pa) is a measure of the viscosity of the unsheared sample at a critical strain value of 11.1%

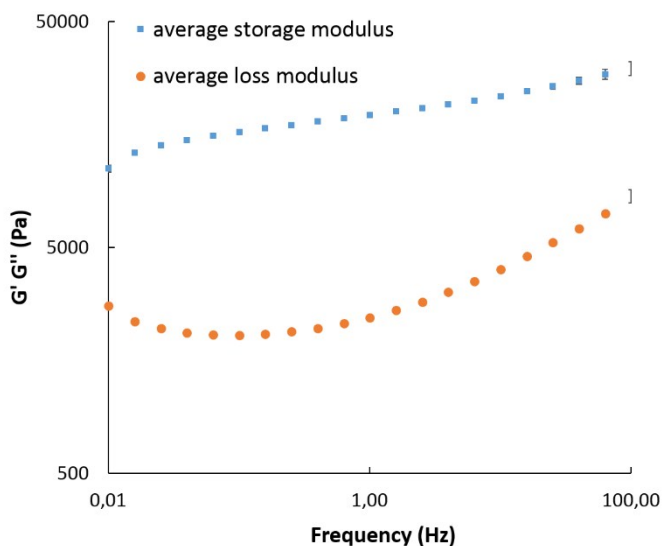

Figure S2 After the linear viscoelastic region has been defined by a strain sweep, the ink's structure can be further characterized using a frequency sweep at a strain below the critical strain ( $\gamma_c = 11.1$  %). Below the critical strain, the elastic modulus  $G'$  is often nearly independent of frequency, as would be expected from a structured or solid-like material. The more frequency dependent the elastic modulus is, the more fluid-like is the material. At all measured values of frequency range, the value of  $G''$  is always an order higher than  $G'$ , which shows inks behaves more like a solid.

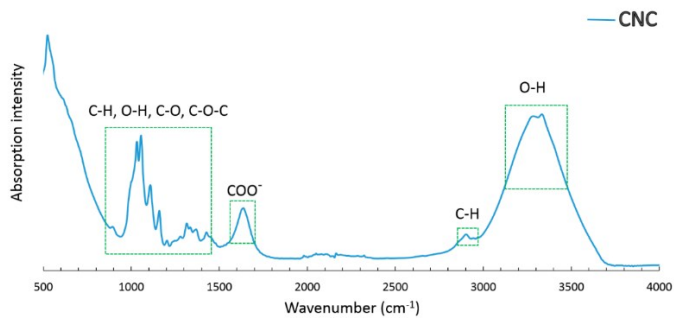

Figure S3 FTIR spectra for CNC.

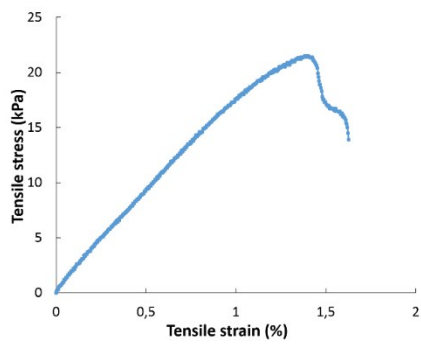

Figure S4 Stress-Strain curve for the 3D printed hydrogel scaffold tested in wet conditions.

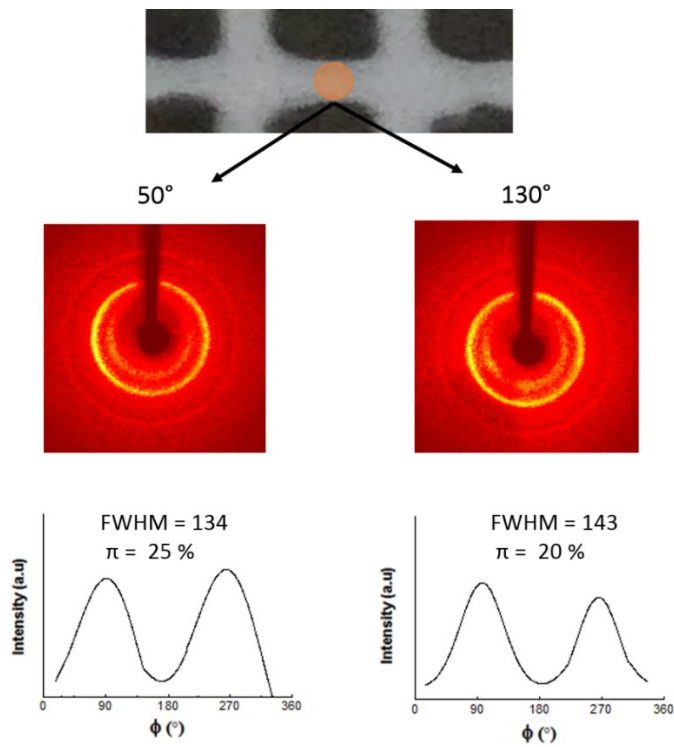

Figure S5 2DWS data representing data measured at the bridge position when phi angle is  $50^\circ$  and  $130^\circ$  for 200 plane.
